# Supplementary material for: On the Utility of Integrated Speed-Accuracy Measures when Speed-Accuracy Trade-off is Present
Source: PubMed Central journal article supplement (PMC7977027; doi:10.5334/joc.154), 2021-03-18
Supplement: joc-4-1-154-s1.pdf [file joc-4-1-154-s1.pdf]

## Appendix A

### LISAS-BIS Relationship

This appendix provides a proof that when the BIS score is based on a single-subject sample it is a linear transformation of LISAS, so that in this case the two scores are equivalent. To do so, the notation is simplified:  $s_r = S_{RTj}$ ,  $s_e = S_{PEj}$ ,  $z_r = z_{RTij}$ , and  $z_c = z_{PEij}$ . Furthermore, because  $PE = (1 - PC)$ , and the underlying binomial distribution,  $s_e = s_c$  and  $z_e = -z_c$ .

The definition of LISAS (4) can be rewritten in standard scores. Starting from the expression for the RT standard scores (eq. 7):

$$z_r = \frac{RT_{ij} - \overline{RT}}{s_r} \quad (17)$$

it follows that

$$z_r s_r = RT_{ij} - \overline{RT} \quad (18)$$

and

$$RT_{ij} = z_r s_r + \overline{RT} \quad (19)$$

Similarly, using equation 6,

$$PE_{ij} = z_e s_e + \overline{PE} \quad (20)$$

so that the definition of LISAS can be rewritten by substitution:

$$LISAS_{ij} = z_r s_r + \overline{RT} + (z_e s_e + \overline{PE}) \frac{s_r}{s_e} \quad (21)$$

Now, multiply the RT group by  $\frac{s_e}{s_e}$  ( $= 1$ ),

$$LISAS_{ij} = \frac{s_e}{s_e} [z_r s_r + \overline{RT}] + (z_e s_e + \overline{PE}) \frac{s_r}{s_e} \quad (22)$$

and distribute  $s_e$  in the denominator

$$LISAS_{ij} = \frac{1}{s_e} [z_r s_e s_r + \overline{RT} s_e + z_e s_e s_r + \overline{PE} s_r] \quad (23)$$

Strip off common terms

$$LISAS_{ij} = [z_r s_r + \overline{RT} + z_e s_r + \overline{PE} \frac{s_r}{s_e}] \quad (24)$$

and regroup

$$LISAS_{ij} = (z_r + z_e) s_r + \overline{RT} + \overline{PE} \frac{s_r}{s_e} \quad (25)$$

Consider that  $z_r + z_e = z_r - z_c = -BIS_{ij}$ , it follows that

$$LISAS_{ij} = s_r \left( \frac{\overline{RT}}{s_r} + \frac{\overline{PE}}{s_e} - BIS_{ij} \right) \quad (26)$$

and also that

$$\text{BIS}_{ij} = \frac{\text{LISAS}_{ij}}{s_r} - \frac{\overline{\text{RT}}}{s_r} - \frac{\overline{\text{PE}}}{s_e} \quad (27)$$
