# Supplementary material for: On the Utility of Integrated Speed-Accuracy Measures when Speed-Accuracy Trade-off is Present
Source: PubMed Central journal article supplement (PMC7977027; doi:10.5334/joc.154), 2021-03-18
Supplement: joc-4-1-154-s2.pdf [file joc-4-1-154-s2.pdf]

Appendix B

Example

Table B1

*Means per cell of the 2 (Test) × 3 (SAT Settings) repeated measures design for each of the measures in Study 1. The table presents the means for overall PE = 0.05 and the defined speed-accuracy effect size of ±20 ms.*

| Measure | Test | Speeded | Neutral | Accurate |
|---------|------|---------|---------|----------|
| RT      | C    | 1023    | 1046    | 1065     |
|         | E    | 1033    | 1056    | 1076     |
| PE      | C    | 0.237   | 0.190   | 0.133    |
|         | E    | 0.263   | 0.216   | 0.161    |
| IES     | C    | 1345    | 1295    | 1231     |
|         | E    | 1405    | 1350    | 1286     |
| RCS     | C    | 0.745   | 0.775   | 0.814    |
|         | E    | 0.713   | 0.743   | 0.781    |
| LISAS   | C    | 1123    | 1126    | 1120     |
|         | E    | 1144    | 1147    | 1144     |
| BIS     | C    | 0.068   | 0.049   | 0.083    |
|         | E    | -0.055  | -0.071  | -0.056   |
| SCR     | C    | 1386    | 1314    | 1237     |
|         | E    | 1469    | 1379    | 1297     |

This appendix reports the detailed results of one single replication in the simulation study regarding balanced speed-accuracy effects. In this specific replication, average PE was set to 0.20 and  $\beta_j$  (the SAT effect size) was 20 in RT and 0.05 in PE. The means for all seven measures in the study are shown per cell of the 2 (Test: control vs. experimental) by 3 (SAT Settings: speed, neutral or accuracy) repeated measures design in Table B1. This table shows that in the speeded conditions RTs are about 20 ms faster than in the neutral condition in both the control and the experimental condition. Similarly, RTs are about 20 ms slower in the
